# Supplementary material for: Enhanced MRI relaxivity of aquated Gd3+ ions by carboxyphenylated water-dispersed graphene nanoribbons
Source: Royal Society of Chemistry journal article supplement (doi:10.1039/c3nr06026h), 2014-01-01
Supplement: c3nr06026h.pdf [file c3nr06026h.pdf]

## Supporting Information

### Enhanced MRI relaxivity of aquated $\text{Gd}^{3+}$ ions by carboxyphenylated water-soluble graphene nanoribbons

Ayrat Gizzatov, Vazrik Keshishian, Adem Guven, Ayrat M. Dimiev, Feifei Qu, Raja Muthupillai, Paolo Decuzzi, Robert G. Bryant, James M. Tour,\* and Lon J. Wilson\*

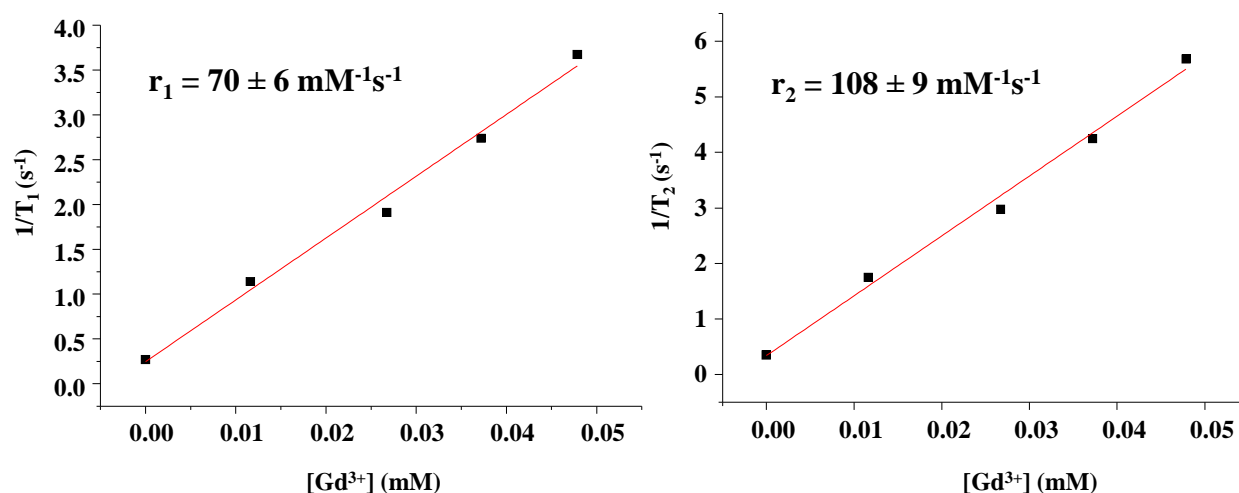

**Fig. S1** Plots of  $[\text{Gd}^{3+}]$  vs  $1/T_1$  and  $1/T_2$  for the Gd/GNR sample at 1.41 T and 37 °C. The slopes of the least-squared fitted red lines represent the relaxivity ( $r_1$ ,  $r_2$ ) values per  $\text{Gd}^{3+}$  ion.

#### MRI acquisition parameters:

The  $T_1$  relaxation times of the samples were measured using an inversion recovery prepared spin echo sequence with the following acquisition parameters: acquisition voxel size:  $1.25 * 1.25 * 5 \text{ mm}^3$ ; TR/TE ms: 15000 ms / 8.8 ms; scan time: 16 min. The experiment was repeated at various inversion times (TIs): 100ms, 300ms, 500ms, 1000ms, 1500ms, 2500ms, 3500ms, and 4500ms (Figure S2). The  $T_2$  relaxation times of the samples were measured using a multi-echo spin echo sequence with the following acquisition parameters: acquisition voxel size:  $1.25 * 1.25 * 5 \text{ mm}^3$ ; TR/TE ms: 15000 ms / 25 ms; 32 echos were measured with echo spacing of 25ms (Figure S3); Scan time: 16 min.

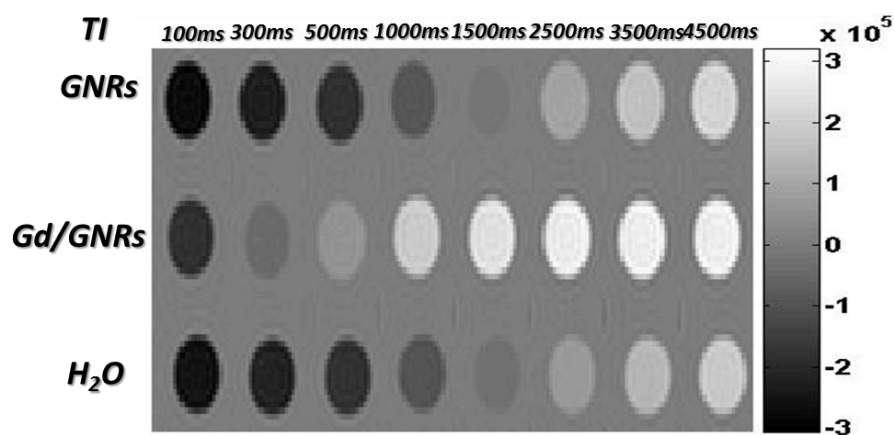

**Fig. S2** T<sub>1</sub>-weighted MRI inversion recovery phantom images acquired at different inversion times (TI) for the GNR, Gd/GNR samples in aqueous solutions and H<sub>2</sub>O at 1.5 T.

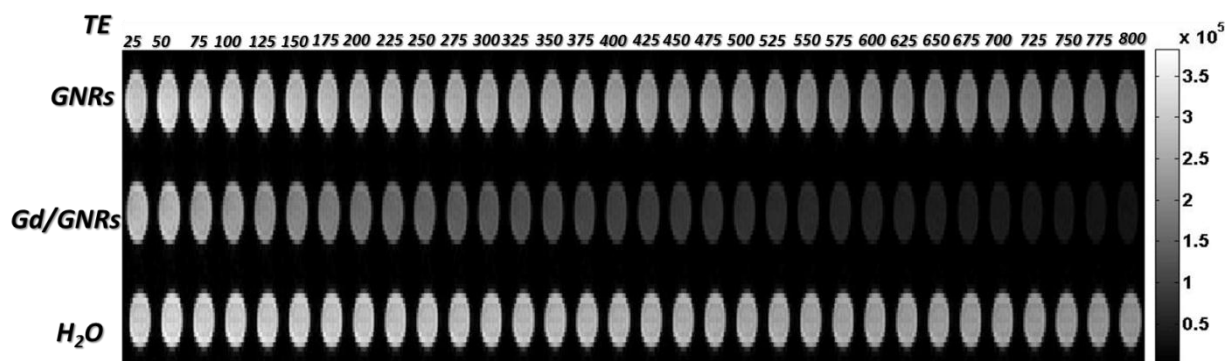

**Fig. S3** T<sub>2</sub>-weighted MRI spin-echo phantom images acquired at different echo times (TE) for the GNR, Gd/GNR samples in aqueous solutions and H<sub>2</sub>O at 1.5 T.
